# Supplementary material for: LncRNA SNHG1 contributes to sorafenib resistance by activating the Akt pathway and is positively regulated by miR-21 in hepatocellular carcinoma cells
Source: Springer Nature journal article supplement (doi:10.1186/s13046-019-1177-0), 2019-05-03
Supplement: MOESM1 [file 16699456]

## Supplementary Materials and Methods

|                                                                             |   |
|-----------------------------------------------------------------------------|---|
| List of antibodies, main reagents and kits.....                             | 2 |
| Cell fraction isolation.....                                                | 3 |
| Cell viability analysis.....                                                | 3 |
| Transfection of miRNA mimics, anti-miRNA and siRNA oligonucleotides.....    | 4 |
| Transfection of SNHG1 smart silencer.....                                   | 4 |
| Assessment of apoptosis <i>in vitro</i> .....                               | 5 |
| Assessment of autophagy.....                                                | 5 |
| Quantitative reverse-transcription polymerase chain reaction (qRT-PCR)..... | 5 |
| Plasmid constructs and luciferase assays.....                               | 6 |
| Western blot analysis.....                                                  | 7 |
| Immunohistochemistry and <i>in situ</i> Ki-67 proliferation index.....      | 8 |
| <i>In situ</i> detection of apoptotic cells.....                            | 9 |
| References.....                                                             | 9 |

### List of antibodies, main reagents and kits used in the study

| Name                              | Catalogue No. | Supplier      |
|-----------------------------------|---------------|---------------|
| Anti-PTEN Ab                      | #9552         | CST           |
| Anti-LC3A/B Ab                    | #12741        | CST           |
| Anti-mTOR Ab                      | #2972         | CST           |
| Anti-AKT Ab                       | #4691         | CST           |
| Anti-P-AKT (Ser473) Ab            | #4060         | CST           |
| Anti-caspase-3 Ab                 | #9662         | CST           |
| Anti-caspase-3 Ab                 | #9665         | CST           |
| Anti-4EBP1 Ab                     | #9452         | CST           |
| Anti-p-4EBP1 Ab                   | #9455         | CST           |
| Anti- S6K Ab                      | #2708         | CST           |
| Anti-p-S6K Ab                     | #9208         | CST           |
| Anti-cyclin D1 Ab                 | #2922         | CST           |
| Anti-GSK-3 $\beta$ Ab             | #9315         | CST           |
| Anti-P-GSK-3 $\beta$ Ab           | #5558         | CST           |
| Anti-caspase-9 Ab                 | #9508         | CST           |
| GAPDH                             | #2118         | CST           |
| LaminA/C                          | #2032         | CST           |
| Anti- $\beta$ -actin Ab           | sc-130065     | Santa Cruz    |
| Anti-caspase-9 Ab                 | sc-56073      | Santa Cruz    |
| FITC-conjugated rat anti-mouse Ab | sc-516140     | Santa Cruz    |
| Anti-SLC3A2 Ab                    | A01794-1      | BosterBio     |
| Anti-Beclin-1                     | ab207612      | Abcam         |
| Mouse anti-Digoxigenin Ab         | Ab420         | Abcam         |
| Cy3-conjugated goat anti-mouse Ab | ab97035       | Abcam         |
| HRP-conjugated goat anti-mouse    | ab6789        | Abcam         |
| Anti-Ki67 Ab                      | ab15580       | Abcam         |
| HRP goat anti-mouse Ab            | TA130004      | OriGene       |
| HRP goat anti-rabbit Ab           | TA140003      | OriGene       |
| HRP rabbit anti-goat Ab           | TA130032      | OriGene       |
| HRP rabbit anti-rat Ab            | TA130038      | OriGene       |
| VECTASTAIN® ELITE ABC kit         | SK-4100       | Vector        |
| TUNEL kit                         | # 11684795910 | Sigma-Aldrich |
| Lipofectamine2000                 | #11668019     | Invitrogen    |
| CCK-8                             | CK04-05       | Dojindo       |
| DAPI                              | d9564         | Sigma-Aldrich |

Notes: Ab, antibody; BosterBio, Boster Biological Technology (Pleasanton, CA, USA); CST, Cell Signaling Technology (Boston, MA, USA); Santa Cruz; Santa Cruz Biotechnology (Santa Cruz, CA, USA); Cytoskeleton (Denver, CO, USA); R&D Systems (Minneapolis, MN, USA);

Sigma-Aldrich (St. Louis, MO, USA); Invitrogen (Carlsbad, CA, USA), FITC, fluorescein isothiocyanate; HRP, horseradish peroxidase; OriGene (OriGene Technologies, Inc., Beijing, China); S6K (ribosomal protein S6 kinase); TUNEL, Terminal deoxynucleotidyl transferase-mediated dUTP nick end labeling agent; Dojindo, Dojindo Molecular Technologies, Gaithersburg, MD, USA; Vector, Vector Laboratories (CA, USA); DAPI, 4',6-diamidino-2-phenylindole, GSK-3 $\beta$ , glycogen synthase kinase 3 $\beta$ . GAPDH, glyceraldehyde 3-phosphate dehydrogenase; mTOR, mammalian target of rapamycin; PTEN, phosphatase and tensin homolog; 4EBP1, eukaryotic translation initiation factor 4E-binding protein 1; LC3, microtubule-associated protein 1 light chain 3.

### **Cell viability assay**

The Cell Counting Kit-8 (CCK-8) (Dojindo Molecular Technologies, Inc. Beijing, China) was used to determine cell viability. Cells were seeded at  $1 \times 10^3$  cells/well in 96-well plates. At different time points, the culture medium was replaced with 100  $\mu$ l of fresh medium containing 10 $\mu$ l of CCK-8 solution. The cells were further incubated for 2 h at 37°C, and the optical density (OD) at 450 nm was measured. The experiment was repeated thrice.

### **Cell fraction isolation**

The methods have been described previously [1]. Briefly, cells were rinsed with cold DEPC-treated PBS twice, then were scraped down and centrifuged to pellet the cells. Lysis buffer was added to the pellet and pipetted up and down ten times followed by being immediately centrifuged at 8,000 rpm for 1min. The supernatant was transferred to a new tube as the cytoplasm extracts, and the remainder were considered as nuclear

fraction after washing once with wash buffer. The isolation was validated by Western blot analysis using antibody against GAPDH for cytoplasm and antibody against laminA/C for nuclear extracts.

### **Transfection of miRNA mimics, anti-miRNA and siRNA oligonucleotides**

The methods have been described previously [2]. A siRNA targeting human SLC3A2 (SLC3A2-si) (5'-UUGCAGUGAACAGACAUCCCG-3'), a siRNA targeting SNHG1 (SNHG1-si) (5'-CAGCAGTTGAGGGTTTGCTGTGTAT-3'), miR-21 mimics (5'-AACAUCAUCUCUGAUAAAGCUAAU-3'), anti-miR-21 (5'-UCAACAUCAGUCUGAUAAAGCUA-3') and the negative control oligonucleotides (5'-CAGUACUUUUGUGUAGUACAA-3') were purchased from GenePharma (Shanghai, China). Cells were grown to 60-70% confluence, and incubated with siRNAs at a final concentration of 0.1  $\mu$ M by using Lipofectamine<sup>TM</sup> 2000 (Invitrogen, Beijing, China) in a serum-free medium for 48 h and then subjected to the assays.

### **Transfection of SNHG1 smart silencer**

Ribo<sup>TM</sup> lncRNA Smart Silencer and the protocol were provided by Guangzhou RiboBio Co., Ltd., Guangzhou, China. Briefly, cells were grown to 30-50% confluence and transfected with oligonucleotides mixed with Lipofectamine 2000 at a concentration of 100 nM. The smarter silencer was a pool containing three siRNAs and three antisense oligonucleotides that target different sites of SNHG1 gene as follows:

si-SNHG1 sequence 1: 5'-UGUAAGAGCAUAAACCAUGUA-3' and 5'-

CAUGGUUUUAUGCUCUUACAGA-3'; si-SNHG1 sequence 2: 5'-UUACAAGA ACUGUAGUACCGG-3' and 5'- GGUACUACAGUUCUUGUAAGG-3'; si-SNHG1 sequence 3: 5'-ACACUUUAAGGUACAUCUGAA-3' and 5'-CAGAUGUACCUUA AAGUGUUA-3'. Antisense oligonucleotides target sequence as following: 5'- AAGACCACGAAGCCACTTACCACGA-3', 5'-TGGCCGTAAGAACTTACTG CAACAA -3' and 5'- ACACCAATTTGGATAATTACCTGTA-3'.

### **Assessment of apoptosis *in vitro***

Cells ( $1 \times 10^5$ ) were incubated in 110  $\mu$ l of binding buffer containing 5  $\mu$ l of Annexin V and 5  $\mu$ l of PI for 15 min at room temperature in dark, and then subjected to flow cytometry to measure the apoptosis rate (%) with the cytometer. Cells were also visualized under laser scanning confocal microscopy.

### **Autophagy assays**

Cells were incubated with acridine orange (5  $\mu$ M) at 37°C for 15 min, washed with cold PBS, and examined by fluorescent microscopy. AVOs appeared as orange/red fluorescent cytoplasmic vesicles, while nuclei were stained green. Acridine orange-stained cells were further trypsinized and analyzed on a FACScalibur flow cytometer (BD. Biosciences, San Jose, California, USA). The degree of autophagic lysosome was expressed as fold change of acridine orange fluorescence intensity (FL3) of red in treated cells versus control cells. Tumor tissues were fixed in 2.5% glutaraldehyde solution for 1 h, washed twice with PBS, followed by further fixation with 1% Osmic

acid for 1 h, dehydrated with a graded series of ethanol, embedded, and sectioned. Sections were stained with uranium acetate and lead citrate, and observed under a transmission electron microscope (JEN-M1220, Toshiba, Japan) [13].

### **Quantitative reverse-transcription polymerase chain reaction (qRT-PCR)**

Methods have been described in details previously [3, 4]. Briefly, total RNA was extracted from cell lysates or cytoplasm and nuclear extracts using TRIzol reagent (Invitrogen, Carlsbad, Calif., USA) according to the manufacturer's protocols. RNA quantity and quality were measured using a NanoDrop ND-1000, and RNA integrity. RNA was reverse transcribed with oligo (dT) primer into cDNA with High Efficient Reverse Transcription Kit (Toyobo). The reaction mixtures for qRT-PCR were prepared with the primers as shown in Table S1. The PCR products were analyzed by MX3000P Real-time PCR systems (Stratagen, USA). Experiments were performed in triplicate, and data were calculated by  $\Delta\Delta C_t$  methods.

### **Plasmid constructs and luciferase assays**

Two miR-21 targeting sites in the enhancer/promoter regions of human lncRNA SNHG1 gene were established by using RNAhybrid 2.2, a tool for finding minimum free energy hybridization (<http://bibiserv.techfak.uni-bielefeld.de/rnahybrid>) [5] (As shown in Fig. 5A). The SNHG1 fragment containing the two putative miR-21 targeting sites, was amplified by PCR using a pair of primers, 5'-GGGCCGGCCTCTTACAGAGGAGACCTTG-3' and 5'-GGAAGCTTGTAAGATAGAGGCAGACTG-3', and cloned into the NaeI and HindIII sites of pMIR-

REPORT vector (Ambion). This constructed reporter was named wild-type-SNHG1 (WT). To construct the mutant reporter plasmid, we used the Generate site-directed mutagenesis system (Invitrogen) to introduce mutations into the putative miR-21 targeting sites of the wild-type-SNHG1 vector. Three mutant reporters were constructed (Mut1, “TAAGCT” [62622089-62622094 nt] mutated to “ATTCGA”; Mut2, “TAAGCT” [62622157-62622162 nt] mutated to “ATTCGA”; Mut3, the combination of Mut1 and Mut 2) (Fig. 5). Luciferase reporter transfection and dual-luciferase assays were performed as described previously [3]. Briefly, the reporter vector plasmid was transfected into cells using Lipofectamine 2000. To correct transfection efficiency, an empty luciferase reporter vector without the miR-21 target was transfected in parallel. Luciferase activities in cells were measured by using a luciferase assay kit (Promega, Madison, WI) and were expressed as ratios of the luciferase activity of the reporter vector with miR-21 targeting sequence over the one without the miR-21 targeting sequence.

### **Western blot analysis**

The methods have been described previously [6, 7]. Cells or tumor tissues were homogenized in protein lysate buffer (50 mM Tris pH 7.4, 100  $\mu$ M EDTA, 0.25 M sucrose, 1%SDS, 1% NP40, 1 $\mu$ g/ml leupeptin, 1 $\mu$ g/ml pepstatin A and 100  $\mu$ M phenyl methyl sulfonyl flouride) and debris was removed by centrifugation at 10,000  $\times$  g for 10 min at 4°C. Protein concentrations of cell or tissue lysates were determined using the Bio-Rad protein assay (Bio-Rad, Richmond, CA, USA). Lysates were resolved on

sodium dodecyl sulfate-polyacrylamide (SDS-PAGE) gels, electrophoretically transferred to polyvinylidene difluoride (PVDF) membranes. The membranes were blocked in TBST (137 mM NaCl, 20 mM Tris HCl [pH 7.6], and 0.1% [v/v] Tween 20) containing 5% (w/v) nonfat dry milk at 37°C for 2 h, and then incubated overnight with primary Abs, and subsequently with alkaline phosphatase-conjugated secondary Abs for 2 h at room temperature in the dark. They were developed with 5-bromo-4-chloro-3-indolyl phosphate (BCIP)/ nitro blue tetrazolium (NBT) (Tiangen Biotech Co. Ltd., Beijing, China). The density of each band was measured using a densitometric analysis program (FR200, Shanghai, China). In preliminary experiments, serial dilutions of lysates (containing 2.5, 5, 10, 20, 40 or 80µg protein) were immunoblotted; band intensities were measured and plotted against protein amounts to generate a standard curve, and the amount of protein for each blot was determined.

### **Immunohistochemistry and *in situ* Ki-67 proliferation index**

Formalin fixed tumor specimens were transferred to 70% ethanol, and subsequently paraffin-embedded and sectioned. Tumor sections were rinsed with PBS, blocked with 3% BSA for 2 h, and incubated with anti-PEA-15 or anti-Ki-67 Abs at 4°C overnight. They were subsequently incubated for 30 min with the appropriate secondary Ab using the Ultra-Sensitive TMS-P kit (Zhongshan Co., Beijing, China), and immunoreactivity developed with Sigma FAST DAB (3,3'-diaminobenzidine tetrahydrochloride) and CoCl<sub>2</sub> enhancer tablets (Sigma-Aldrich, Shanghai, China). Sections were counterstained with hematoxylin, mounted, and examined by microscopy. Tumoral



expression of PEA-15 was examined under microscopy. The Ki-67 positive cells were counted in 10 randomly selected  $\times 400$  high-power fields under microscopy. The Ki-67 proliferation index was calculated according to the following formula: the number of Ki-67 positive cells/ the total cell count  $\times 100\%$ .

### ***In situ* detection of apoptotic cells**

Tumor cryosections were prepared 4 days after intratumoral injection of shRNAs, and stained with the TUNEL (Terminal deoxynucleotidyl transferase dUTP nick end labeling) (Roche, Shanghai, China). The TUNEL positive cells were counted in 20 randomly selected  $\times 200$  high-power fields under microscopy. The apoptosis index was calculated according to the following formula: the number of apoptotic cells  $\times$  /total number of nucleated cells  $\times 100\%$ .

### **References**

- [1] P. Wang, J. Xu, Y. Wang, X. Cao, An interferon-independent lncRNA promotes viral replication by modulating cellular metabolism, *Science* (New York, N.Y.) 358(6366) (2017) 1051-1055.
- [2] W. Jiang, G. Li, W. Li, P. Wang, P. Xiu, X. Jiang, B. Liu, X. Sun, H. Jiang, Sodium orthovanadate overcomes sorafenib resistance of hepatocellular carcinoma cells by inhibiting Na(+)/K(+)-ATPase activity and hypoxia-inducible pathways, *Scientific reports* 8(1) (2018) 9706.
- [3] C. He, X. Dong, B. Zhai, X. Jiang, D. Dong, B. Li, H. Jiang, S. Xu, X. Sun, MiR-

21 mediates sorafenib resistance of hepatocellular carcinoma cells by inhibiting autophagy via the PTEN/Akt pathway, *Oncotarget* 6(30) (2015) 28867-81.

[4] B. Zhai, F. Hu, X. Jiang, J. Xu, D. Zhao, B. Liu, S. Pan, X. Dong, G. Tan, Z. Wei, H. Qiao, H. Jiang, X. Sun, Inhibition of Akt reverses the acquired resistance to sorafenib by switching protective autophagy to autophagic cell death in hepatocellular carcinoma, *Molecular cancer therapeutics* 13(6) (2014) 1589-98.

[5] M. Rehmsmeier, P. Steffen, M. Hochsmann, R. Giegerich, Fast and effective prediction of microRNA/target duplexes, *RNA (New York, N.Y.)* 10(10) (2004) 1507-17.

[6] L. Li, X. Jiang, Q. Zhang, X. Dong, Y. Gao, Y. He, H. Qiao, F. Xie, X. Xie, X. Sun, Neuropilin-1 is associated with clinicopathology of gastric cancer and contributes to cell proliferation and migration as multifunctional co-receptors, *Journal of experimental & clinical cancer research : CR* 35(1) (2016) 16.

[7] Z. Wei, X. Jiang, H. Qiao, B. Zhai, L. Zhang, Q. Zhang, Y. Wu, H. Jiang, X. Sun, STAT3 interacts with Skp2/p27/p21 pathway to regulate the motility and invasion of gastric cancer cells, *Cellular signalling* 25(4) (2013) 931-8.
